# Supplementary material
Source: PubMed Central journal article supplement (PMC4824234)
Supplement: SD9.pdf [file SD9.pdf]

## 10 Chromosome

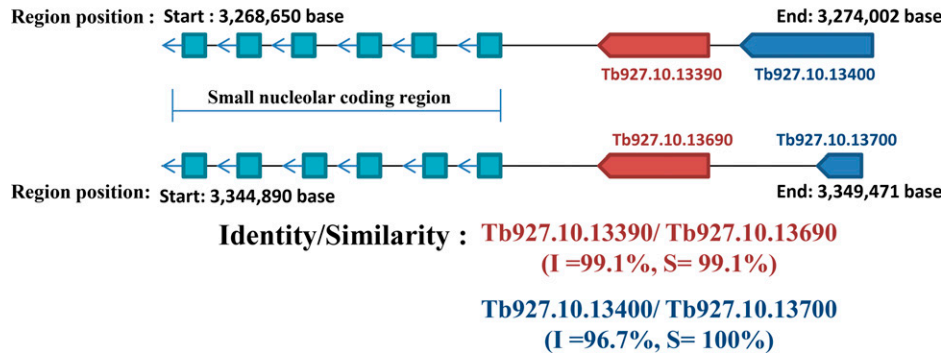

SUPPLEMENTAL FIGURE 1. Organization of *TbLPP2* and *TbLPP2-related protein* on chromosome 10. The locus containing both genes was identified from TriTrypDB (<http://tritrypdb.org/tritrypdb/>). Arrows indicate direction of transcription. Each locus was drawn according to the map provided at TriTrypDB for chromosome 10. Numbers corresponding to the start point and the end point refer to the nucleotide position of the chromosome 10 that contain the locus from which both genes were taken.

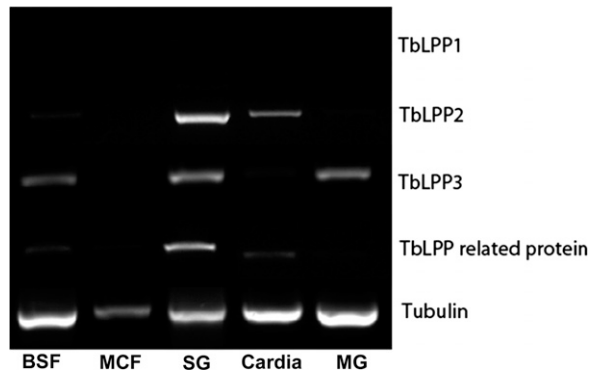

SUPPLEMENTAL FIGURE 2. Differential transcript abundance of *TbLPPs*. Reverse transcriptase polymerase chain reaction (PCR) using gene-specific primers in a 35-cycle PCR. Gel agarose visualization of *TbLPP*-amplified gene products from bloodstream form (BSF), metacyclic form (MCF), midgut (MG), cardia, and salivary gland (SG) parasites from 42-day-old infected tsetse flies.

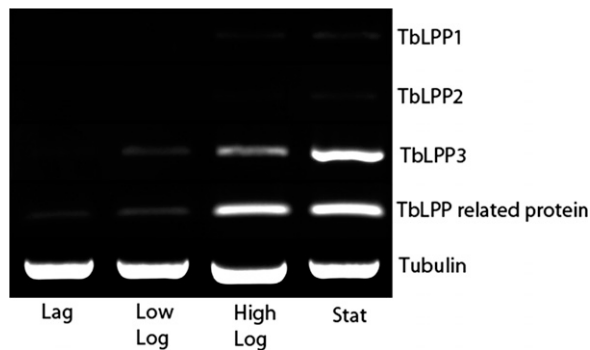

SUPPLEMENTAL FIGURE 3. Differential transcript abundance of *TbLPPs* in procyclic parasites from different phases of cellular growth. Reverse transcriptase polymerase chain reaction (RT-PCR) using gene-specific primers in a 35-cycle PCR. Gel agarose visualization of *TbLPP*-amplified gene products from different phases of cellular growth. RT-PCR using gene-specific primers in a 35-cycles PCR from parasites from lag, low log, high log, and stationary phases.

SUPPLEMENTAL TABLE 1

ANOVA/Tukey's multicomparison for differential transcript abundance of *TbLPPs* in different tissues

|                               | Significant | Summary | Adjusted <i>P</i> value |
|-------------------------------|-------------|---------|-------------------------|
| <i>TbLPP2</i>                 |             |         |                         |
| BSF vs. MCF                   | Yes         | *       | 0.0184                  |
| BSF vs. SG                    | Yes         | ****    | < 0.0001                |
| BSF vs. PV                    | Yes         | **      | 0.0073                  |
| BSF vs. MG                    | No          | ns      | 0.7196                  |
| MCF vs. SG                    | Yes         | ****    | < 0.0001                |
| MCF vs. PV                    | No          | ns      | 0.97                    |
| MCF vs. MG                    | Yes         | **      | 0.0029                  |
| SG vs. PV                     | Yes         | ****    | < 0.0001                |
| SG vs. MG                     | Yes         | ****    | < 0.0001                |
| PV vs. MG                     | Yes         | **      | 0.0012                  |
| <i>TbLPP3</i>                 |             |         |                         |
| BSF vs. MCF                   | No          | ns      | 0.6087                  |
| BSF vs. SG                    | Yes         | *       | 0.0434                  |
| BSF vs. PV                    | Yes         | *       | 0.049                   |
| BSF vs. MG                    | No          | ns      | 0.9592                  |
| MCF vs. SG                    | Yes         | **      | 0.0048                  |
| MCF vs. PV                    | No          | ns      | 0.4008                  |
| MCF vs. MG                    | No          | ns      | 0.9278                  |
| SG vs. PV                     | Yes         | ***     | 0.0004                  |
| SG vs. MG                     | Yes         | *       | 0.0155                  |
| PV vs. MG                     | No          | ns      | 0.136                   |
| <i>TbLPP2-related protein</i> |             |         |                         |
| BSF vs. MCF                   | No          | ns      | 0.9391                  |
| BSF vs. SG                    | Yes         | *       | 0.0298                  |
| BSF vs. PV                    | No          | ns      | 0.9817                  |
| BSF vs. MG                    | No          | ns      | 0.5675                  |
| MCF vs. SG                    | No          | ns      | 0.0951                  |
| MCF vs. PV                    | No          | ns      | 0.9994                  |
| MCF vs. MG                    | No          | ns      | 0.2276                  |
| SG vs. PV                     | No          | ns      | 0.0681                  |
| SG vs. MG                     | Yes         | **      | 0.003                   |
| PV vs. MG                     | No          | ns      | 0.3055                  |

ANOVA = analysis of variance; BSF = bloodstream form; MCF = metacyclic form; MG = midgut; ns = nonsignificant; PV = proventriculus; SG = salivary glands; *TbLPP* = *Trypanosoma brucei* lipid phosphate phosphatases gene.*TbLPP2*: ANOVA, *F* = 119.9; df = 4, 10; *P* < 0.0001.*TbLPP3*: ANOVA, *F* = 12.4; df = 4, 10; *P* = 0.0008.*TbLPP2-related protein*: ANOVA, *F* = 7.023; df = 4, 10; *P* = 0.0058.

\*Analyses were performed using GraphPad Prism 6 (La Jolla, CA).

SUPPLEMENTAL TABLE 2

ANOVA/Tukey's multicomparison for differential transcript abundance of *TbLPPs* in procyclic parasites from different phases of cellular growth

| Phase                         | Significant | Summary | Adjusted <i>P</i> value |
|-------------------------------|-------------|---------|-------------------------|
| <i>TbLPP1</i>                 |             |         |                         |
| Lag vs. low log               | No          | ns      | 0.8953                  |
| Lag vs. high log              | Yes         | *       | 0.02                    |
| Lag vs. stationary            | Yes         | **      | 0.0012                  |
| Low log vs. high log          | No          | ns      | 0.0524                  |
| Low log vs. stationary        | Yes         | **      | 0.0025                  |
| High log vs. stationary       | No          | ns      | 0.1686                  |
| <i>TbLPP2</i>                 |             |         |                         |
| Lag vs. low log               | No          | ns      | > 0.9999                |
| Lag vs. high log              | No          | ns      | 0.998                   |
| Lag vs. stationary            | No          | ns      | 0.352                   |
| Low log vs. high log          | No          | ns      | 0.9956                  |
| Low log vs. stationary        | No          | ns      | 0.3303                  |
| High log vs. stationary       | No          | ns      | 0.4311                  |
| <i>TbLPP3</i>                 |             |         |                         |
| Lag vs. low log               | No          | ns      | 0.7903                  |
| Lag vs. high log              | Yes         | *       | 0.0158                  |
| Lag vs. stationary            | Yes         | ****    | < 0.0001                |
| Low log vs. high log          | No          | ns      | 0.057                   |
| Low log vs. stationary        | Yes         | ****    | < 0.0001                |
| High log vs. stationary       | Yes         | ****    | < 0.0001                |
| <i>TbLPP2-related protein</i> |             |         |                         |
| Lag vs. low log               | No          | ns      | 0.4134                  |
| Lag vs. high log              | Yes         | ***     | 0.0001                  |
| Lag vs. stationary            | Yes         | ****    | < 0.0001                |
| Low log vs. high log          | Yes         | ***     | 0.0004                  |
| Low log vs. stationary        | Yes         | ****    | < 0.0001                |
| High log vs. stationary       | Yes         | **      | 0.0016                  |

ANOVA = analysis of variance; ns = nonsignificant; *TbLPP* = *Trypanosoma brucei* lipid phosphate phosphatases gene.*TbLPP1*: ANOVA, *F* = 16.62; df = 3, 8; *P* = 0.0008.*TbLPP2*: ANOVA, *F* = 1.516; df = 3, 8; *P* = 0.2832.*TbLPP3*: ANOVA, *F* = 71.16; df = 3, 8; *P* < 0.0001.*TbLPP2-related protein*: ANOVA, *F* = 92.36; df = 3, 8; *P* < 0.0001.

\*Analyses were performed using GraphPad Prism 6.

SUPPLEMENTAL TABLE 3  
List of gene specific primers

| Gene                                           | Orientation (5'-3') | Sequence                |
|------------------------------------------------|---------------------|-------------------------|
| <i>Tb927.7.480 (TbLPP1)</i>                    | Forward             | ACGGAGCCACTACGCGGGTA    |
|                                                | Reverse             | CGGGGCACAAGCACTGCGAT    |
| <i>Tb927.10.13400 (TbLPP2)</i>                 | Forward             | CGAAAGCGGGACGTGCTGTTTCG |
|                                                | Reverse             | AGCGTGCGCCACACAGATGC    |
| <i>Tb927.10.13700 (TbLPP2-related protein)</i> | Forward             | GCATTCTCCCGCAACTTCGTTCG |
|                                                | Reverse             | GTTATATCAGACACCACCTGC   |
| <i>Tb927.10.13930 (TbLPP3)</i>                 | Forward             | GATCGGTTGAGGCGTGAGGGC   |
|                                                | Reverse             | GCTCCAGACGGCGGGGCACTAG  |
